# Supplementary material for: The conserved AAA-ATPase PCH-2 TRIP13 regulates spindle checkpoint strength
Source: PubMed Central journal article supplement — Mol Biol Cell. 2020 Sep 15;31(20):2219–33. doi: 10.1091/mbc.E20-05-0310 (PMC7550697; doi:10.1091/mbc.e20-05-0310), 2020-09-15
Supplement: mbc-31-2219-s001.pdf [file mbc-31-2219-s001.pdf]

# Supplemental Materials

*Molecular Biology of the Cell*

Défachelles *et al.*

**Figure S1: Related to Figure 1. The mitotic delay observed in *pch-2;ani-2<sup>RNAi</sup>;zyg-1<sup>RNAi</sup>* small cells is a spindle checkpoint response.**

Cartoon of control and *ani-2<sup>RNAi</sup>* 2-cell embryos (A) and an *ani-2<sup>RNAi</sup>;zyg-1<sup>RNAi</sup>* 2-cell embryo (B). Mitotic timing in AB cells plotted against cell volume, during unperturbed mitosis (C) and in the presence of monopolar spindles. (D). Lines represent least-squares regression models for each set of data. For (C) equations and p values indicating whether slopes are significantly non-zero for each model are: *ani-2<sup>RNAi</sup>* (blue):  $y = -9.744 \times 10^{-3}x + 3.001$  and  $p = 0.6073$ ; *pch-2;ani-2<sup>RNAi</sup>* (red):  $y = -0.1315x + 3.503$  and  $p = 0.0483$ ; *mad-1;ani-2<sup>RNAi</sup>* (green):  $y = -0.2944x + 4.247$  and  $p = 0.0251$ . In (D), 95% confidence intervals are indicated by gray shaded areas and equations and p values indicating whether slopes are significantly non-zero for each model are: *san-1;ani-2<sup>RNAi</sup>;zyg-1<sup>RNAi</sup>* P<sub>1</sub> (blue):  $y = -0.4136x + 5.535$  and  $p = 0.1885$ ; *san-1;pch-2;ani-2<sup>RNAi</sup>;zyg-1<sup>RNAi</sup>* P<sub>1</sub> (red):  $y = -0.3541x + 5.647$  and  $p = 0.0643$ . The regression model of *pch-2;ani-2<sup>RNAi</sup>;zyg-1<sup>RNAi</sup>* embryos from Figure 1C is indicated by the opaque red line in (D) for comparison.

**Figure S2: Related to Figure 2: There is no difference in GFP::MAD-2 fluorescence around mitotic chromosomes in *ani-2<sup>RNAi</sup>;zyg-1<sup>RNAi</sup>* embryos and *pch-2;ani-2<sup>RNAi</sup>;zyg-1<sup>RNAi</sup>* AB cells.**

(A) Images of MAD-2::GFP in AB cells of control *ani-2<sup>RNAi</sup>;zyg-1<sup>RNAi</sup>* embryos or *pch-2;ani-2<sup>RNAi</sup>;zyg-1<sup>RNAi</sup>* embryos after NEBD. Scale bar indicates 5  $\mu\text{m}$ . (B) Quantification of GFP::MAD-2 fluorescence around mitotic chromosomes in AB cells of control and *pch-2* embryos plotted against cell volume.

**Figure S3: Related to Figure 3. Nuclear volume does not scale with cell volume in *ani-2<sup>RNAi</sup>* 2-cell embryos.**

(A) Images of a large (top) and small (bottom) AB cell of *ani-2<sup>RNAi</sup>* embryos. The nuclear area is indicated with a dashed yellow line. Scale bar indicates 5  $\mu$ m. (B) Nuclear area plotted against cell volume.

**Figure S4: Related to Figure 5. PCH-2 is required for the spindle checkpoint in the germline lineage.**

(A) Mitotic timing of control and *pch-2* mutant embryos during unperturbed divisions or in the presence of monopolar spindles. Data for control embryos is the same as Figure 7B. Error bars indicate 95% confidence intervals.

**Figure S5: Related to Figure 6. There is no difference in the amount of PCH-2::GFP or GFP::MAD-2 recruited to unattached kinetochores in AB and P<sub>1</sub> cells.**

(A) Cartoon and images of PCH-2::GFP recruitment to unattached kinetochores in AB and P<sub>1</sub> cells of 2-cell embryos. Scale bar indicates 1  $\mu$ m. (B) Quantification of PCH-2::GFP recruitment at unattached kinetochores in AB and P<sub>1</sub> cells. (C) Cartoon and images of GFP::MAD-2 recruitment to unattached kinetochores in AB and P<sub>1</sub> cells of 2-cell embryos. Scale bar indicates 1  $\mu$ m. (D) Quantification of GFP::MAD-2 fluorescence at unattached kinetochores in AB and P<sub>1</sub> cells. All error bars are 95% confidence intervals. NS indicates not significant.

**Figure S6: Related to Figure 6. There is no difference in the amount of PCH-2::GFP around mitotic chromosomes in AB cells with bipolar or monopolar spindles.** (A) Cartoon

and images of PCH-2::GFP localization around mitotic chromosomes in AB cells of 2-cell embryos. Scale bar indicates 5  $\mu$ m. Yellow dashed circle indicates area of PCH-2::GFP fluorescence. (B) Quantification of PCH-2::GFP fluorescence in AB cells with bipolar spindles (control) or monopolar spindles (*zyg-1<sup>RNAi</sup>*). (C) Quantification of area of PCH-2::GFP fluorescence in AB cells with bipolar spindles or monopolar spindles. (D) Quantification of

integrated density of PCH-2::GFP fluorescence in AB cells with bipolar spindles or monopolar spindles. All error bars are 95% confidence intervals. NS indicates not significant.

**Figure S7: Related to Figure 6. PCH-2's enrichment in P<sub>1</sub> cells is around chromosomes and does not depend on GPR-1/2.**

(A) Quantification of PCH-2::GFP fluorescence in the cytoplasm of AB and P<sub>1</sub> cells. (B) Images of AB (left) and P<sub>1</sub> (right) cells after NEBD. Scale bar indicate 5 μm. (C) Quantification of cell area in AB and P<sub>1</sub> cells of control RNAi and *gpr-1/2*<sup>RNAi</sup> 2-cell embryos. Red symbols indicate cells in which PCH-2::GFP fluorescence was quantified in (D). (D) Quantification of PCH-2::GFP fluorescence in AB and P<sub>1</sub> cells of control RNAi and *gpr-1/2*<sup>RNAi</sup> embryos. (E) Cartoon and images of PCH-2::GFP localization around mitotic chromosomes in AB and P<sub>1</sub> cells of control RNAi and *gpr-1/2*<sup>RNAi</sup> 2-cell embryos. Scale bars indicate 5 μm. Error bars are 95% confidence intervals. NS indicates not significant.

**Figure S8: Related to Figure 6. PCH-2's enrichment around mitotic chromosomes in P<sub>1</sub> cells depends on PAR-6.** (A and B) Quantification of cell area in AB and P<sub>1</sub> cells of control RNAi, *par-1*<sup>RNAi</sup> and *par-6*<sup>RNAi</sup> 2-cell embryos. (C) Cartoon and images of PCH-2::GFP localization around mitotic chromosomes in AB and P<sub>1</sub> cells of control RNAi and *par-6*<sup>RNAi</sup> 2-cell embryos. Scale bars indicate 5 μm. (D) Quantification of PCH-2::GFP fluorescence in AB and P<sub>1</sub> cells of control RNAi and *par-6*<sup>RNAi</sup> embryos. Error bars are 95% confidence intervals. NS indicates not significant.

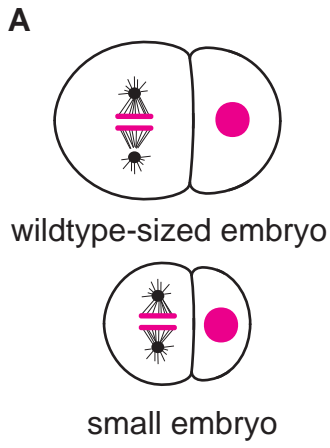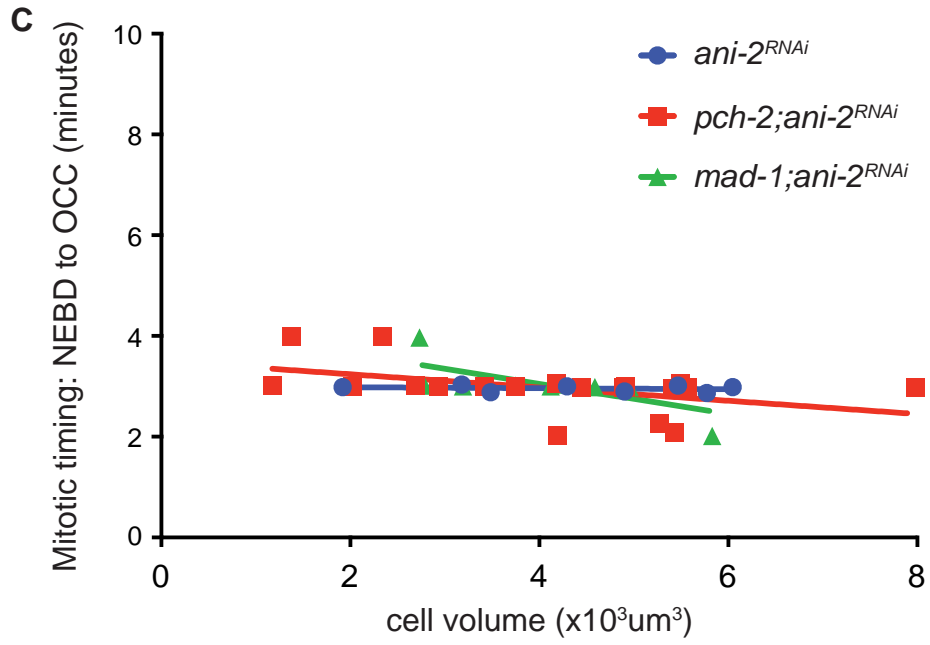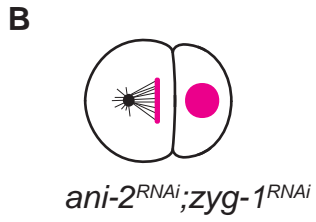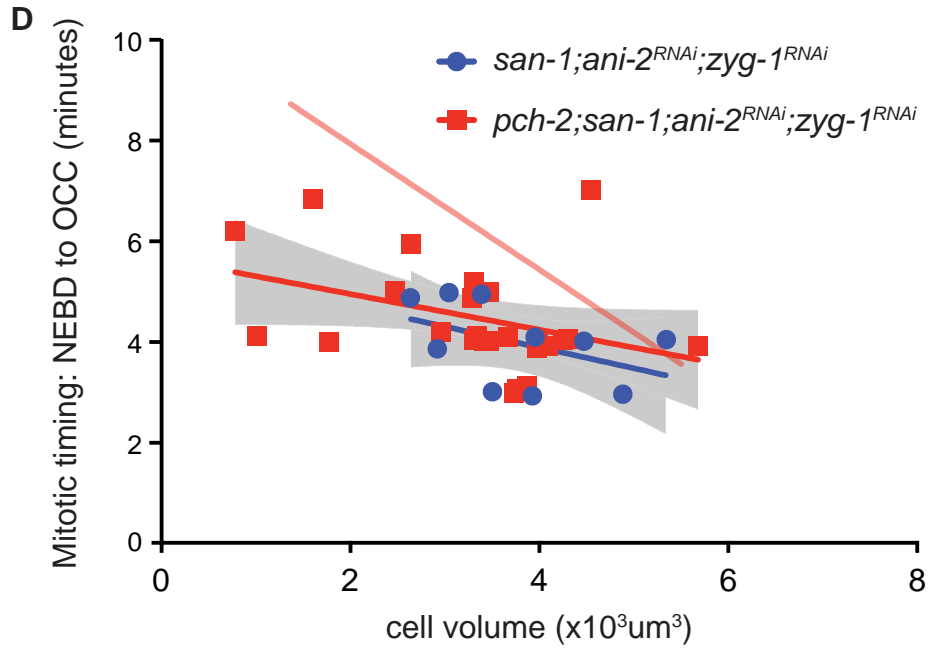

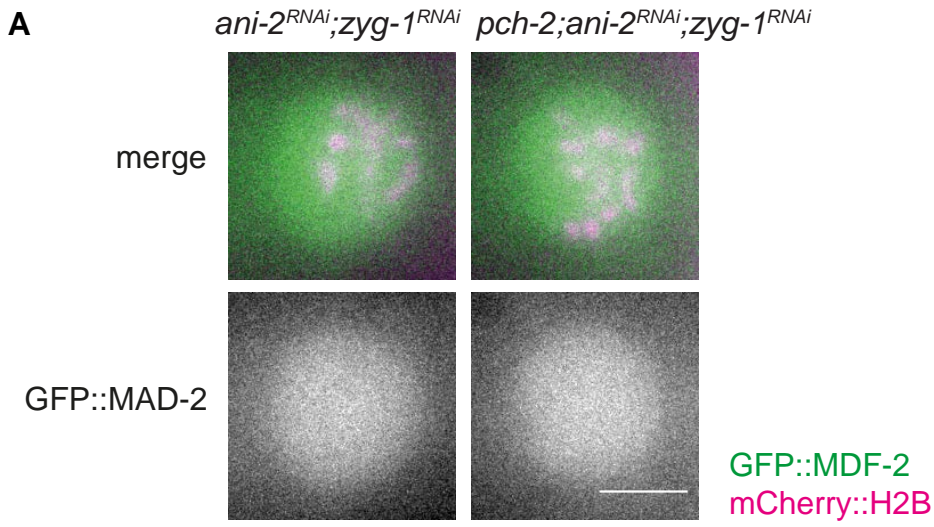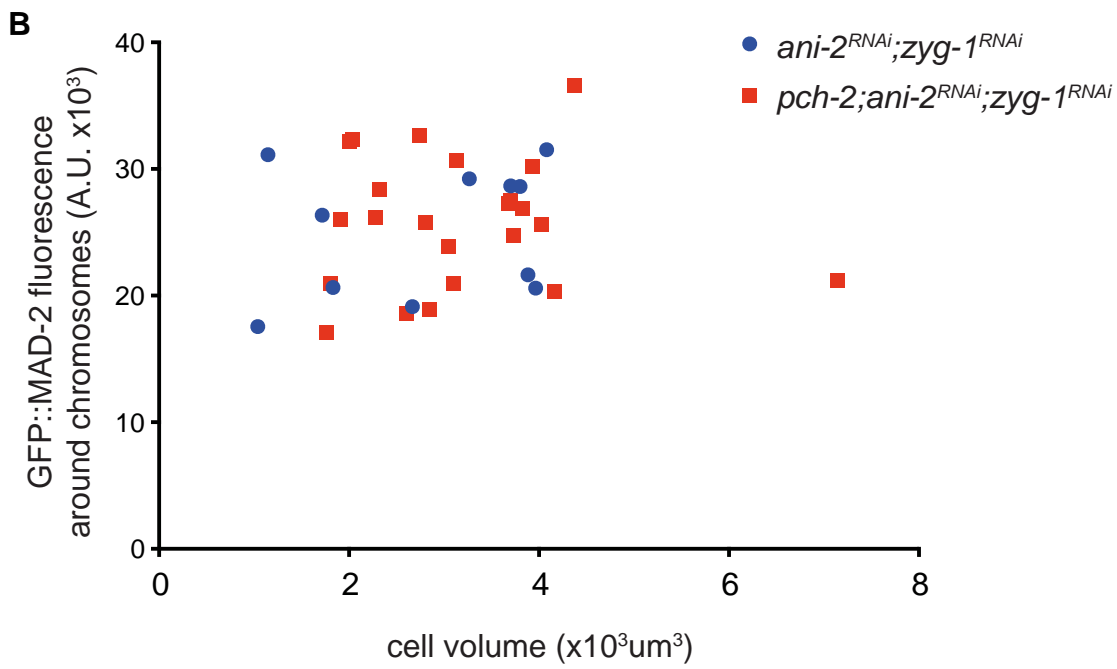

**A**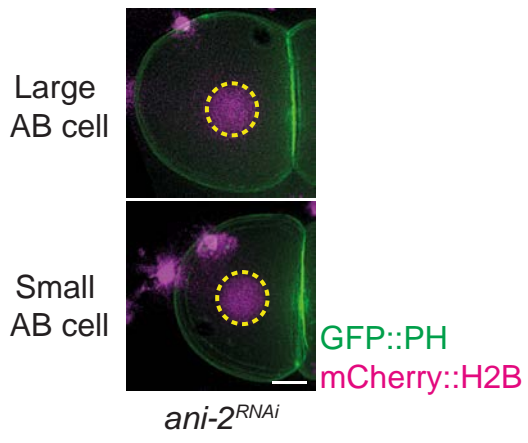**B**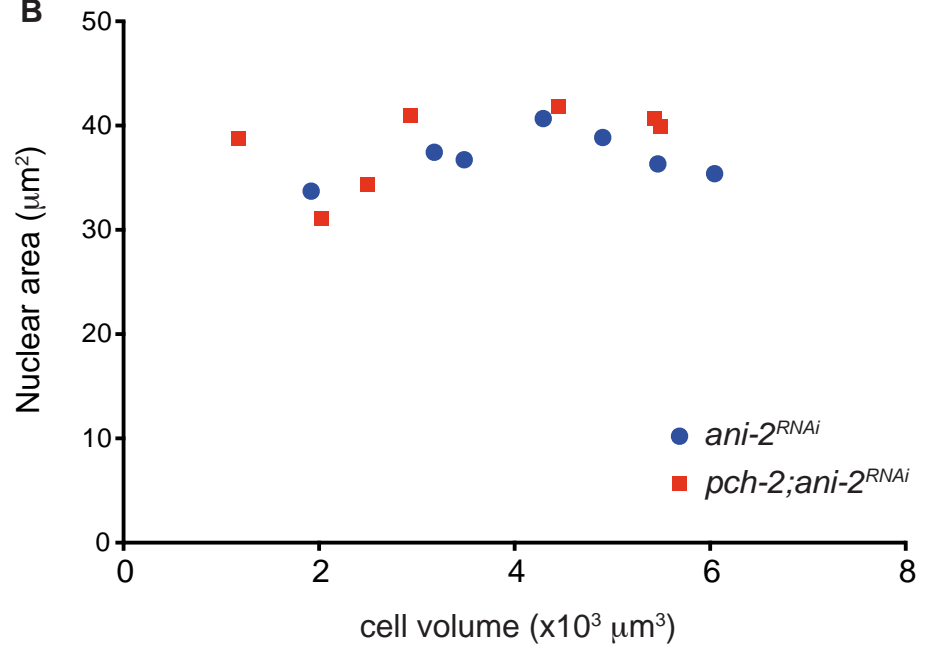

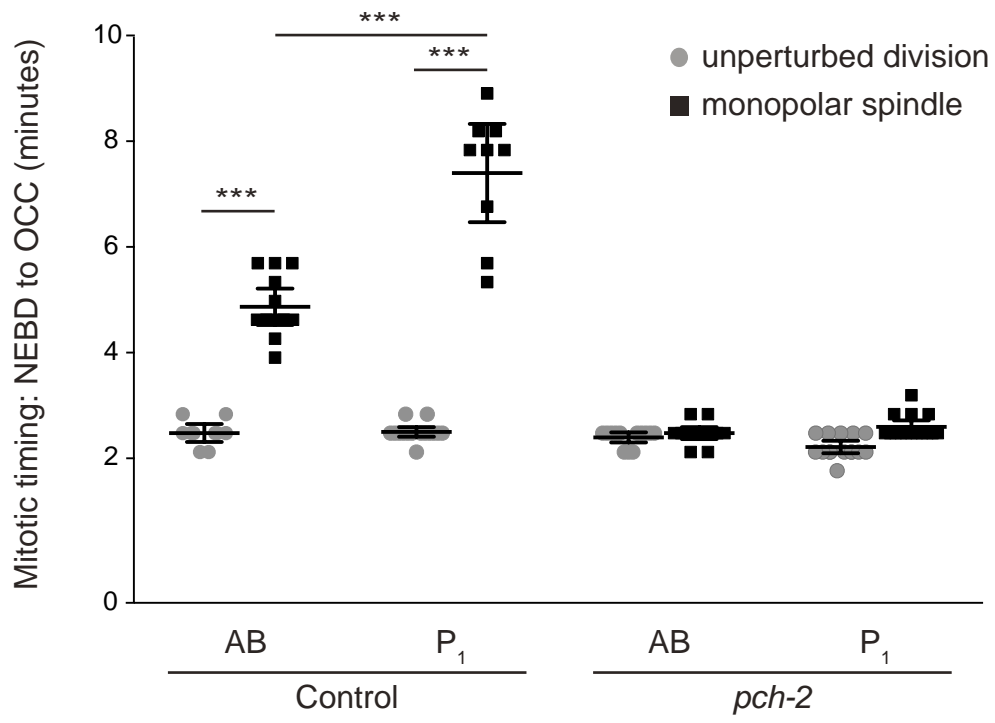



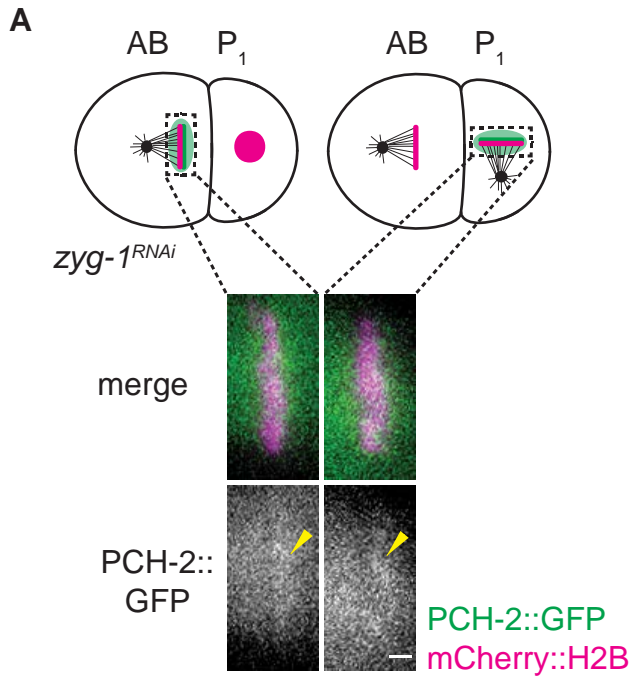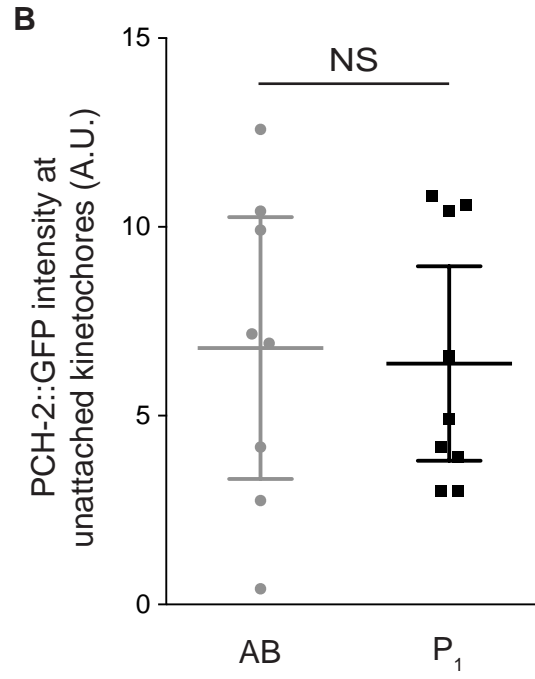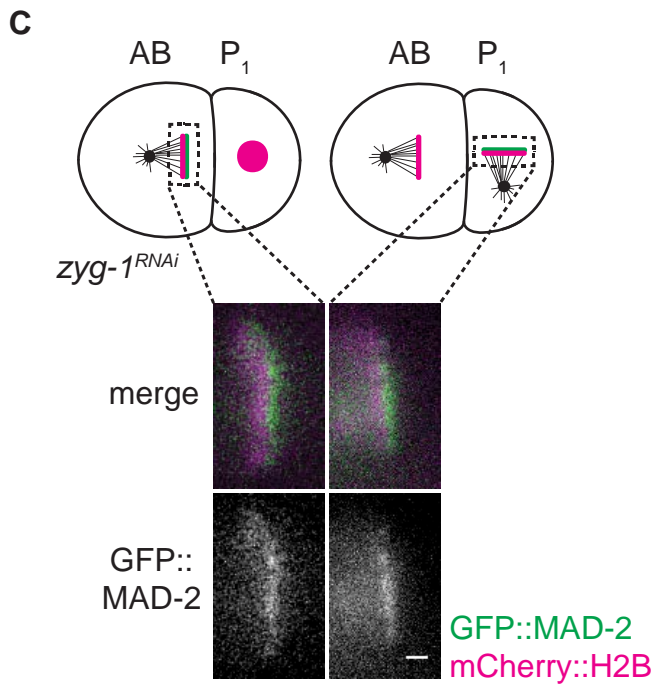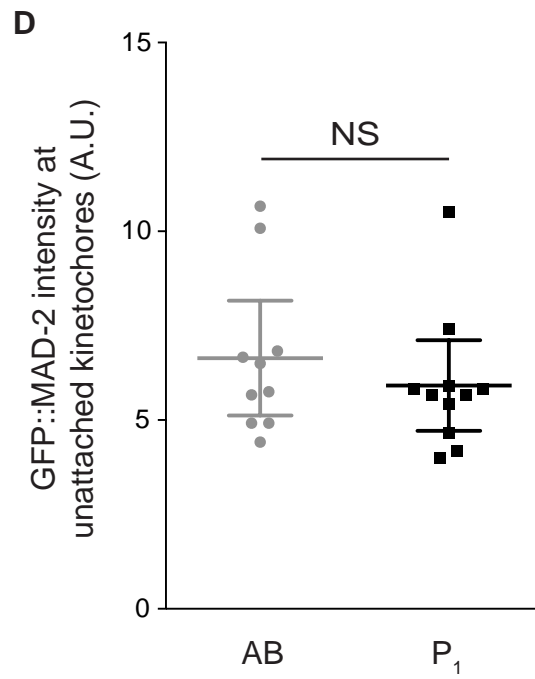

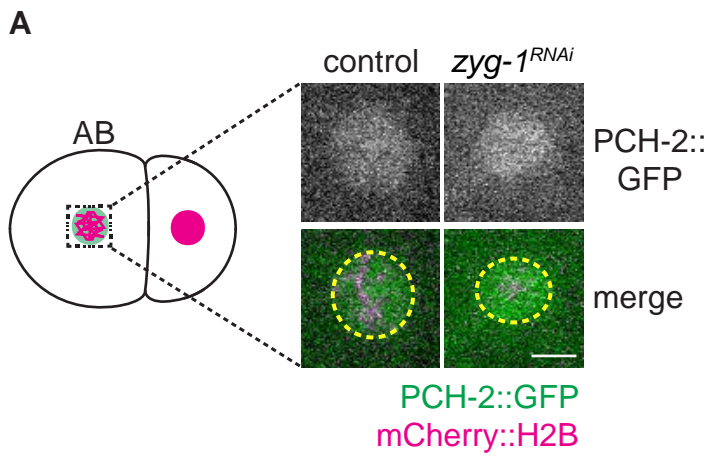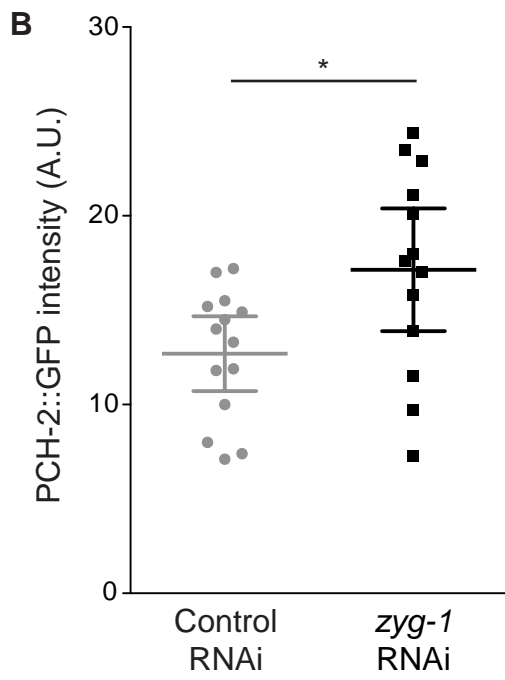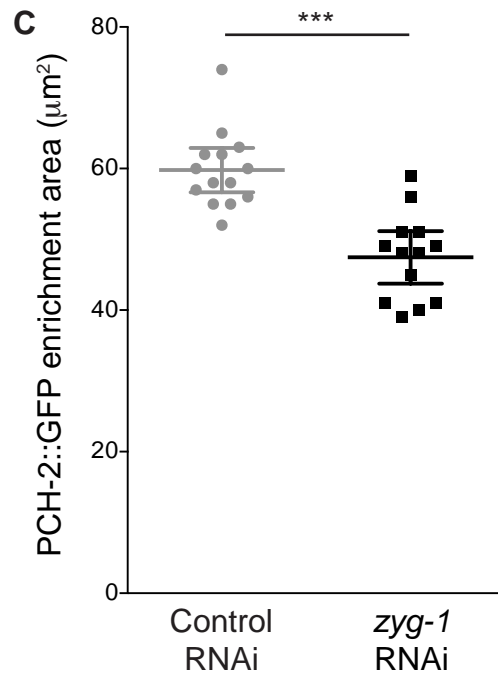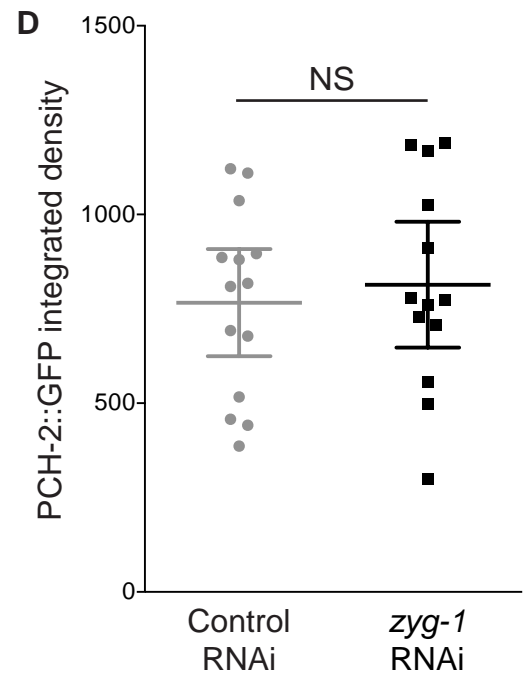

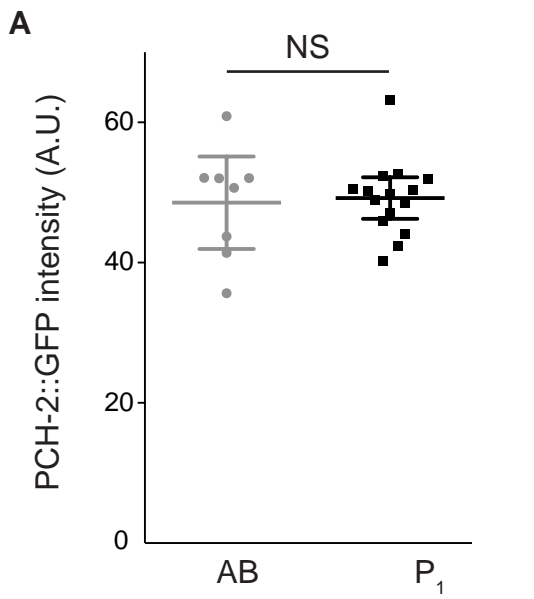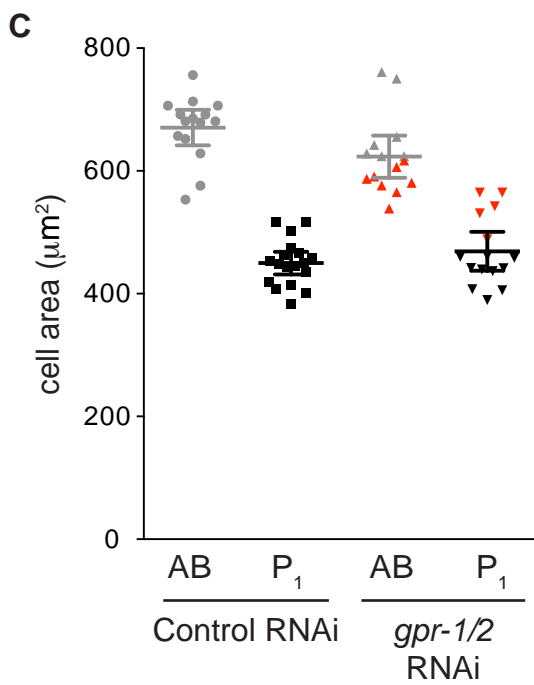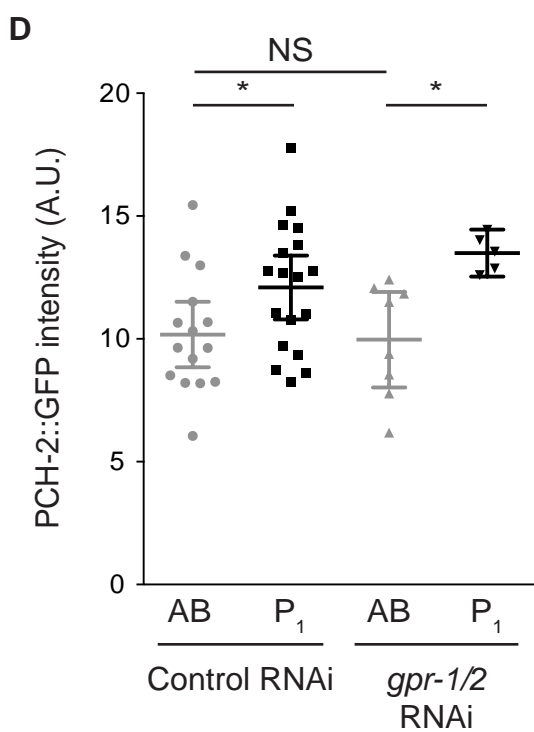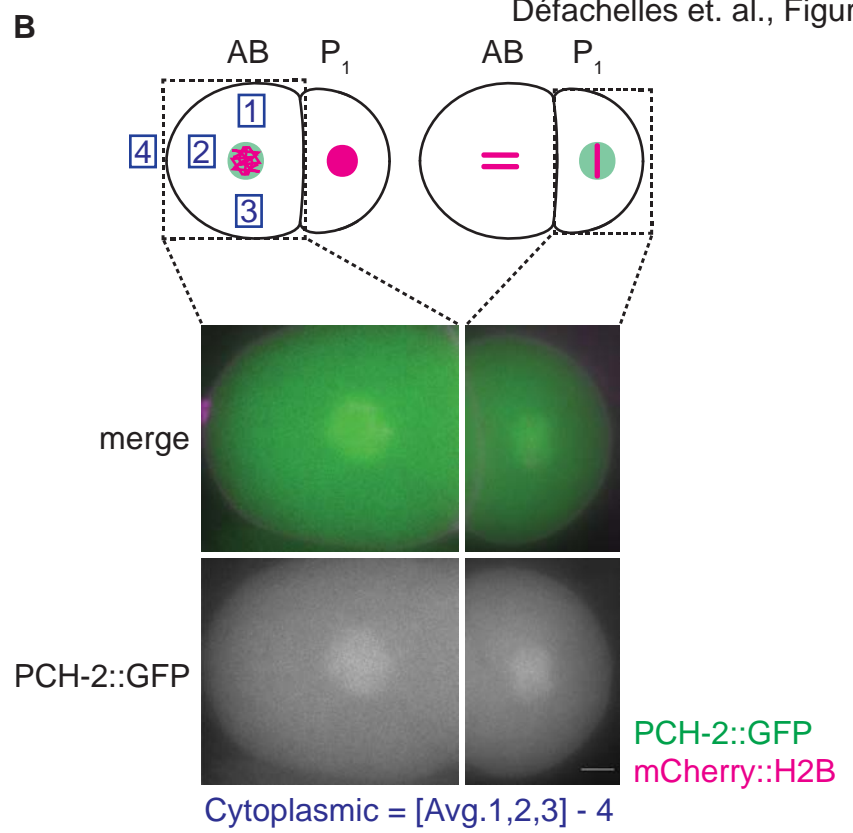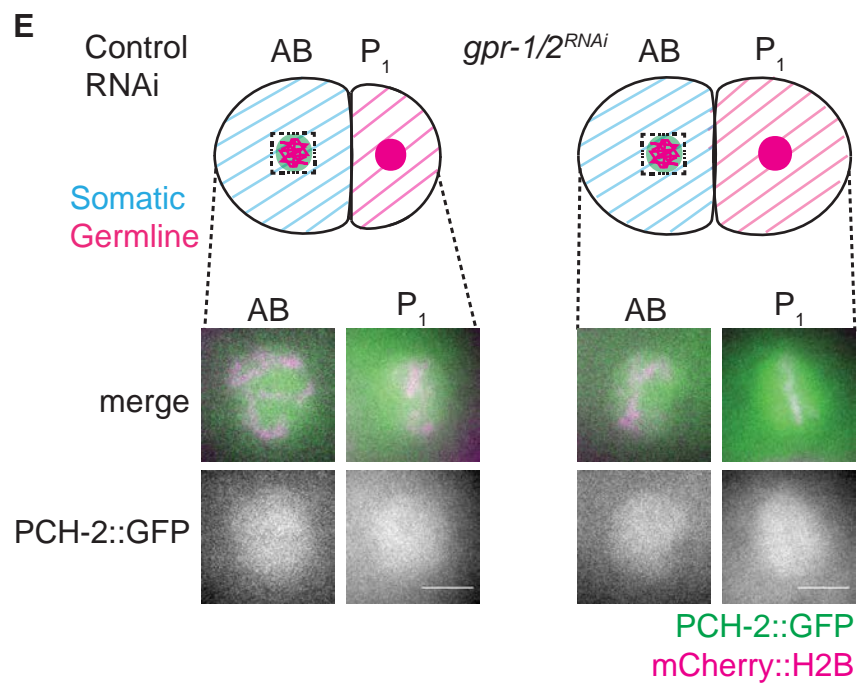

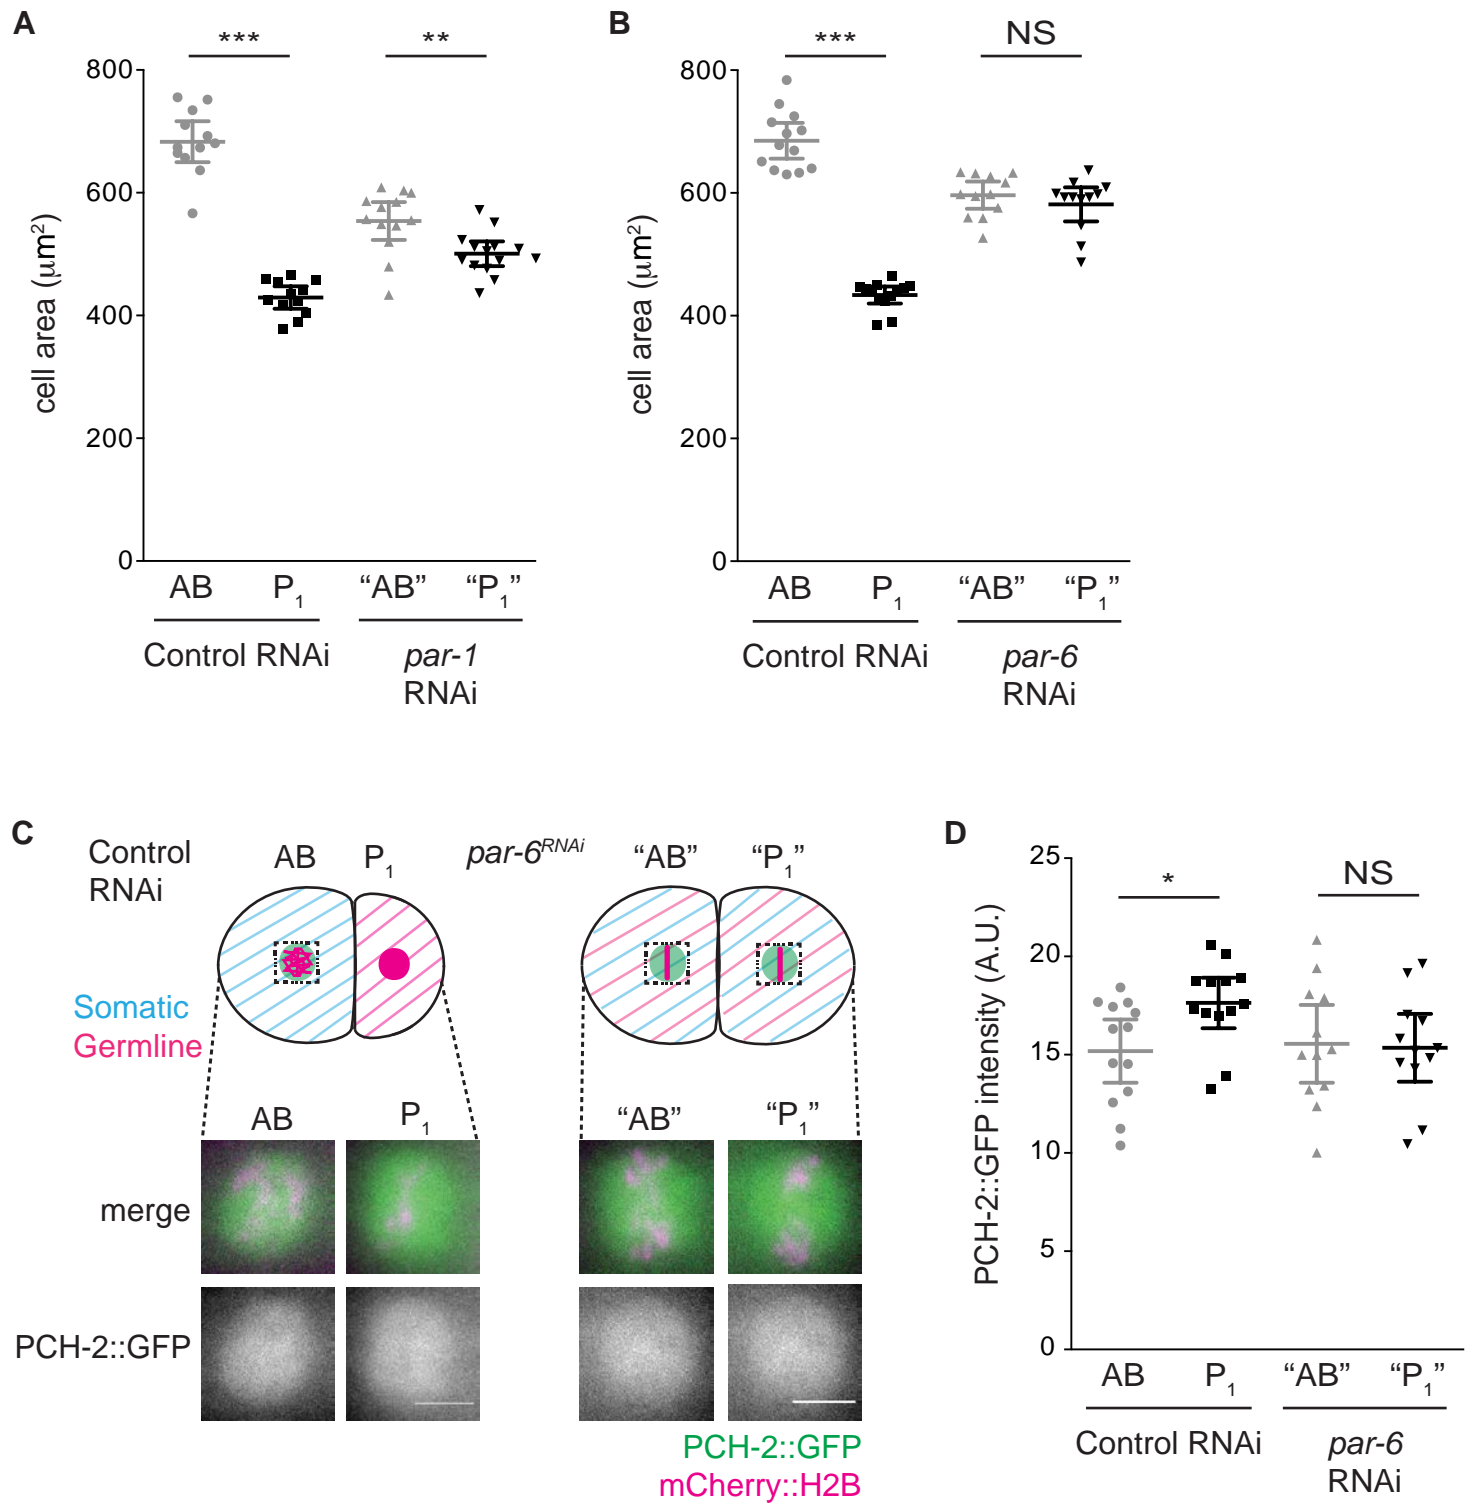

**Table S1: Strains used in this study**

| <b>Strain</b> | <b>Genotype</b>                                                                                                                                                                                                    |
|---------------|--------------------------------------------------------------------------------------------------------------------------------------------------------------------------------------------------------------------|
| OD56          | <i>unc-119(ed3) III; Itls37 [pAA64; Ppie-1::mCherry::his-58; unc-119 (+)] IV</i>                                                                                                                                   |
| OD95          | <i>unc-119(ed3) III; Itls37 [pAA64; Ppie-1::mCherry::his-58; unc-119 (+)] IV; Itls38 [pAA1; Ppie-1::GFP::PH(PLC1delta1); unc-119(+)]</i>                                                                           |
| BHL575        | <i>pch-2(tm1458) II; unc-119(ed3) III; Itls37 [pAA64; Ppie-1::mCherry::his-58; unc-119 (+)] IV; Itls38 [pAA1; Ppie-1::GFP::PH(PLC1delta1); unc-119(+)]</i>                                                         |
| BHL596        | <i>unc-119(ed3) III; Itls37 [pAA64; Ppie-1::mCherry::his-58; unc-119 (+)] IV; Itls38 [pAA1; Ppie-1::GFP::PH(PLC1delta1); unc-119(+)]; mdf-1(av19) V</i>                                                            |
| BHL600        | <i>unc-119(ed3) III; Itls37 [pAA64; Ppie-1::mCherry::his-58; unc-119 (+)] IV; Itls52 [pOD379; Ppie-1::GFP::MDF-2; unc-119 (+)]</i>                                                                                 |
| BHL604        | <i>pch-2(tm1458) II; unc-119(ed3) III; Itls37 [pAA64; Ppie-1::mCherry::his-58; unc-119 (+)] IV; Itls52 [pOD379; Ppie-1::GFP::MDF-2; unc-119 (+)]</i>                                                               |
| BHL608        | <i>cmt-1(ok2879) I; unc-119(ed3) III; Itls37 [pAA64; Ppie-1::mCherry::his-58; unc-119 (+)] IV; Itls38 [pAA1; Ppie-1::GFP::PH(PLC1delta1); unc-119(+)]</i>                                                          |
| BHL664        | <i>Ppch-2::pch-2::GFP-3XFLAG (blt4 [pCN94]) II; unc-119(ed3) III; Itls37 [pAA64; Ppie-1::mCherry::his-58; unc-119 (+)] IV</i>                                                                                      |
| BHL666        | <i>unc-119(ed3) III; Itls37 [pAA64; Ppie-1::mCherry::his-58; unc-119 (+)]; mdf-2(tm2190) IV/nT1[qIs51]( IV;V) Itls38 [pAA1; Ppie-1::GFP::PH(PLC1delta1); unc-119(+)]</i>                                           |
| BHL883        | <i>san-1/mdf-3 (ok1580) I; pch-2(tm1458) II; unc-119(ed3) III; Itls37 [pAA64; Ppie-1::mCherry::his-58; unc-119 (+)] IV; Itls38 [pAA1; Ppie-1::GFP::PH(PLC1delta1); unc-119(+)]</i>                                 |
| BHL887        | <i>cmt-1(ok2879) I; pch-2::GFP-3XFLAG (blt4 [pCN94]) II; unc-119(ed3) III; Itls44[pAA173; pPie-1::mCherry::PH(PLC1delta1); unc-119(+)]; Itls37 [pAA64; Ppie-1::mCherry::his-58; unc-119 (+)] IV</i>                |
| BHL888        | <i>unc-119(ed3) III; Itls44 [pAA173; pPie-1::mCherry::PH(PLC1delta1); unc-119(+)]; Itls52 [pOD379; Ppie-1::GFP::mdf-2; unc-119 (+)]; Itls37 [pAA64; Ppie-1::mCherry::his-58; unc-119 (+)] IV</i>                   |
| BHL889        | <i>pch-2(tm1458) II; unc-119(ed3) III; Itls44 [pAA173; pPie-1::mCherry::PH(PLC1delta1); unc-119(+)]; Itls52 [pOD379; Ppie-1::GFP::mdf-2; unc-119 (+)]; Itls37 [pAA64; Ppie-1::mCherry::his-58; unc-119 (+)] IV</i> |
| BHL891        | <i>unc-119(ed3) III; Itls37 [pAA64; Ppie-1::mCherry::his-58; unc-119 (+)] IV; Itls24[pAZ132; pPie-1::GFP::tba-2; unc-119(+)]</i>                                                                                   |
| BHL892        | <i>pch-2 (tm1458) II; unc-119(ed3) III; Itls37 [pAA64; Ppie-1::mCherry::his-58; unc-119 (+)] IV; Itls24 [pAZ132; pPie-1::GFP::tba-2; unc-119(+)]</i>                                                               |
| BHL893        | <i>san-1/mdf-3 (ok1580) I; unc-119(ed3) III; Itls37 [pAA64; Ppie-1::mCherry::his-58; unc-119 (+)] IV; Itls38 [pAA1; Ppie-1::GFP::PH(PLC1delta1); unc-119(+)]</i>                                                   |
| BHL904        | <i>Ppch-2::pch-2::GFP-3XFLAG (blt4 [pCN94]) II; unc-119(ed3) III; Itls44[pAA173; pPie-1::mCherry::PH(PLC1delta1); unc-119(+)]; Itls37 [pAA64; Ppie-1::mCherry::his-58; unc-119 (+)] IV</i>                         |
| BHL950        | <i>pch-2(tm1458) II; unc-119(ed3) III; Itls37 [pAA64; Ppie-1::mCherry::his-58; unc-119 (+)]; mdf-2(tm2190) IV/nT1[qIs51]( IV;V); Itls38 [pAA1; Ppie-1::GFP::PH(PLC1delta1); unc-119(+)]</i>                        |

|        |                                                                                                                                                                             |
|--------|-----------------------------------------------------------------------------------------------------------------------------------------------------------------------------|
| BHL958 | <i>unc-119(ed3) III; ltIs37 [pAA64; Ppie-1::mCherry::his-58; unc-119 (+)] IV/nT1[qIs51]( IV;V); ltIs38 [pAA1; Ppie-1::GFP::PH(PLC1delta1); unc-119(+)]</i>                  |
| BHL964 | <i>zyg-1(or297) unc-4(e120) II unc-119(ed3) III; ltIs37 [pAA64; Ppie-1::mCherry::his-58; unc-119 (+)] IV; ltIs24[pAZ132; pPie-1::GFP::tba-2; unc-119(+)]</i>                |
| BHL965 | <i>zyg-1(or297) pch-2(tm1458) unc-4(e120) II; unc-119(ed3) III; ltIs37 [pAA64; Ppie-1::mCherry::his-58; unc-119 (+)] IV; ltIs24[pAZ132; pPie-1::GFP::tba-2; unc-119(+)]</i> |
| GAL5   | <i>san-1/mdf-3 (mat5) I; unc-119(ed3) III; ruls57[Ppie-1::GFP::tubulin + unc-119(+)]; ltIs37[pie-1p::mCherry::his-58 (pAA64) + unc-119(+)] IV</i>                           |
